# Supplementary material for: Maternal history of miscarriages and measures of fertility in relation to childhood asthma
Source: PubMed Central journal article supplement (PMC6467238; doi:10.1136/thoraxjnl-2018-211886), 2018-12-04
Supplement: thoraxjnl-2018-211886supp001.pdf [file thoraxjnl-2018-211886supp001.pdf]

**Supplementary Figure S1.** Illustration of the underlying theoretical framework

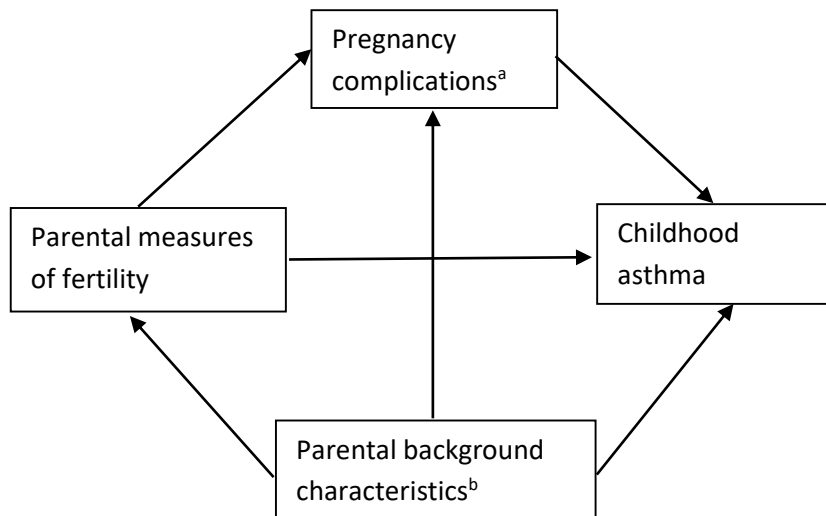

<sup>a</sup> Pregnancy complications evaluated as potential mediators included preterm birth, low birth weight, pre-eclampsia and delivery by caesarean section.

<sup>b</sup> Parental background characteristic evaluated as potential confounders included maternal age, parity, education, smoking during pregnancy, pre-pregnancy body-mass index and asthma.

**Supplementary Table S1.** Comparing the distribution of background characteristics among children who were included and excluded from the registry-based analysis due to missing exposure information

| <b>Background characteristics</b>                  | <b>Excluded<br/>(N=129,174)</b> | <b>Included<br/>(N=474,402 )</b> |
|----------------------------------------------------|---------------------------------|----------------------------------|
| Maternal age at delivery, years N (%)              |                                 |                                  |
| <25                                                | 24,873 (19.3)                   | 79,803 (16.8)                    |
| 25-29                                              | 45,427 (35.2)                   | 155,866 (32.9)                   |
| 30-34                                              | 40,413 (31.3)                   | 159,001 (33.5)                   |
| 35 and older                                       | 18,461 (14.3)                   | 79,732 (16.8)                    |
| Maternal parity, N (%)                             |                                 |                                  |
| 0                                                  | 53,538 (41.5)                   | 193,503 (40.8)                   |
| 1                                                  | 45,311 (35.1)                   | 170,737 (36.0)                   |
| 2                                                  | 21,684 (16.8)                   | 78,163 (16.5)                    |
| 3+                                                 | 8,641 (6.7)                     | 31,999 (6.8)                     |
| Maternal smoking during pregnancy, N (%)           |                                 |                                  |
| No                                                 | 56,162 (78.5)                   | 317,226 (80.5)                   |
| Only at the beginning of pregnancy                 | 6,098 (8.5)                     | 27,929 (7.1)                     |
| Still smoking at the end of pregnancy              | 9,294 (13.0)                    | 48,855 (12.4)                    |
| Missing                                            | 57,620                          | 80,392                           |
| Maternal current asthma, N (%)                     |                                 |                                  |
| No                                                 | 124,586 (96.5)                  | 454,114 (95.7)                   |
| Yes                                                | 4,588 (3.6)                     | 20,288 (4.3)                     |
| Maternal pre-eclampsia, N (%)                      |                                 |                                  |
| No                                                 | 124,414 (96.3)                  | 456,100 (96.1)                   |
| Yes                                                | 4,760 (3.7)                     | 18,302 (3.9)                     |
| Child sex, N (%)                                   |                                 |                                  |
| Male                                               | 66,203 (51.3)                   | 243,413 (51.3)                   |
| Female                                             | 62,971 (48.7)                   | 230,989 (48.7)                   |
| Child preterm birth (<37 gestational weeks), N (%) |                                 |                                  |
| No                                                 | 122,563 (94.9)                  | 449,218 (94.7)                   |
| Yes                                                | 6,611 (5.1)                     | 25,184 (5.3)                     |
| Child low birthweight (<2500 grams), N (%)         |                                 |                                  |
| No                                                 | 125,047 (96.8)                  | 458,572 (96.7)                   |
| Yes                                                | 4,127 (3.2)                     | 15,830 (3.3)                     |
| Missing                                            |                                 |                                  |
| Child delivery by caesarean section, N(%)          |                                 |                                  |
| No                                                 | 112,292 (86.9)                  | 404,328 (85.2)                   |
| Yes                                                | 16,882 (13.1)                   | 70,074 (14.8)                    |
| Child asthma at 7 years, N(%)                      |                                 |                                  |
| No                                                 | 123,875 (95.9)                  | 454,213 (95.7)                   |
| Yes                                                | 5,299 (4.1)                     | 20,189 (4.3)                     |

**Supplementary Table S2.** Distribution of background characteristics according to time to conception and use of assisted reproductive technologies in the Norwegian Mother and Child Cohort Study  
(N= 75,797)

| Background characteristic                     | Time to conception more than 12 months |                  | Conceived by assisted reproductive technologies |                  |
|-----------------------------------------------|----------------------------------------|------------------|-------------------------------------------------|------------------|
|                                               | No<br>(N= 69,916)                      | Yes<br>(N=5,881) | No<br>(N=74,406)                                | Yes<br>(N=1,391) |
| Maternal age at delivery, Mean(SD)            | 29.9 (4.6)                             | 31.6 (4.4)       | 30.0 (4.6)                                      | 32.9 (3.8)       |
| Maternal parity, N (%)                        |                                        |                  |                                                 |                  |
| 0                                             | 29,741 (42.5)                          | 3,318 (56.4)     | 32,118 (43.2)                                   | 941 (67.7)       |
| 1                                             | 25,496 (36.5)                          | 1,795 (30.5)     | 26,917 (36.2)                                   | 374 (26.9)       |
| 2                                             | 11,412 (16.3)                          | 597 (10.2)       | 11,946 (16.1)                                   | 63 (4.5)         |
| 3+                                            | 3,267 (4.7)                            | 171 (2.9)        | 3,425 (4.6)                                     | 13 (0.9)         |
| Maternal education, N (%)                     |                                        |                  |                                                 |                  |
| Less than high school                         | 6,171 (8.8)                            | 527 (9.0)        | 6,607 (8.9)                                     | 91 (6.5)         |
| High school                                   | 21,532 (30.8)                          | 1,953 (33.2)     | 23,084 (31.0)                                   | 401 (28.8)       |
| Up to four years of college                   | 27,955 (40.0)                          | 2,268 (38.6)     | 29,641 (39.8)                                   | 582 (41.8)       |
| More than four years of college               | 13,901 (19.9)                          | 1,117 (19.0)     | 14,707 (19.8)                                   | 311 (22.4)       |
| Missing                                       | 357 (0.5)                              | 16 (0.3)         | 367 (0.5)                                       | 6 (0.4)          |
| Maternal pre-pregnancy body-mass index, N (%) |                                        |                  |                                                 |                  |
| <18.5                                         | 2,132 (3.1)                            | 181 (3.1)        | 2,283 (3.1)                                     | 30 (2.2)         |
| 18.5-24.9                                     | 44,498 (63.6)                          | 3,270 (55.6)     | 46,896 (63.0)                                   | 872 (62.7)       |
| 25-29.9                                       | 14,955 (21.4)                          | 1,436 (24.4)     | 16,066 (21.6)                                   | 325 (23.4)       |
| 30 or higher                                  | 6,233 (8.9)                            | 889 (15.1)       | 6,985 (9.4)                                     | 137 (9.9)        |
| Missing                                       | 2,098 (3.0)                            | 105 (1.8)        | 2,176 (2.9)                                     | 27 (1.9)         |
| Maternal folic acid supplement intake         |                                        |                  |                                                 |                  |
| No                                            | 15,053 (21.5)                          | 967 (16.4)       | 15,927 (21.4)                                   | 93 (6.7)         |
| Started before pregnancy                      | 27,944 (40.0)                          | 2,891 (49.2)     | 29,718 (39.9)                                   | 1,117 (80.3)     |
| Started during pregnancy                      | 26,919 (38.5)                          | 2,023 (34.4)     | 28,761 (38.7)                                   | 181 (13.0)       |
| Maternal smoking during pregnancy, N (%)      |                                        |                  |                                                 |                  |
| No                                            | 52,213 (74.7)                          | 4,351 (74.0)     | 55,358 (74.4)                                   | 1,206 (86.7)     |
| Quit by 18 weeks                              | 9,973 (14.3)                           | 838 (14.3)       | 10,725 (14.4)                                   | 86 (6.2)         |
| Smoked after 18 weeks                         | 7,390 (10.6)                           | 667 (11.3)       | 7,964 (10.7)                                    | 93 (6.7)         |
| Missing                                       | 340 (0.5)                              | 25 (0.4)         | 359 (0.5)                                       | 6 (0.4)          |
| Maternal current asthma, N (%)                |                                        |                  |                                                 |                  |
| No                                            | 64,658 (92.5)                          | 5,425 (92.3)     | 71,859 (96.6)                                   | 1,361 (97.8)     |
| Yes                                           | 5,258 (7.5)                            | 456 (7.8)        | 2,547 (3.4)                                     | 30 (2.2)         |
| Maternal pre-eclampsia, N (%)                 |                                        |                  |                                                 |                  |
| No                                            | 67,333 (96.3)                          | 5,581 (94.9)     | 71,590 (96.2)                                   | 1,324 (95.2)     |
| Yes                                           | 2,583 (3.7)                            | 300 (5.1)        | 2,816 (3.8)                                     | 67 (4.8)         |

|                                                    |               |              |               |              |
|----------------------------------------------------|---------------|--------------|---------------|--------------|
| Child sex, N (%)                                   |               |              |               |              |
| Male                                               | 35,784 (51.2) | 3,027 (51.5) | 38,089 (51.2) | 722 (51.9)   |
| Female                                             | 34,132 (48.8) | 2,854 (48.5) | 36,317 (48.8) | 669 (48.1)   |
| Child preterm birth (<37 gestational weeks), N (%) |               |              |               |              |
| No                                                 | 66,413 (95.0) | 5,436 (92.4) | 70,606 (94.9) | 1,243 (89.4) |
| Yes                                                | 3,254 (4.7)   | 392 (6.7)    | 3,528 (4.7)   | 118 (8.5)    |
| Missing                                            | 249 (0.4)     | 53 (0.9)     | 272 (0.4)     | 30 (2.2)     |
| Child low birthweight (<2500 grams), N (%)         |               |              |               |              |
| No                                                 | 67,966 (97.2) | 5,645 (96.0) | 72,294 (97.2) | 1,317 (94.7) |
| Yes                                                | 1,914 (2.7)   | 232 (3.9)    | 2,073 (2.8)   | 73 (5.3)     |
| Missing                                            | 36 (0.1)      | 4 (0.1)      | 39 (0.1)      | 1 (0.1)      |
| Child delivery by caesarean section, N(%)          |               |              |               |              |
| No                                                 | 60,529 (86.6) | 4,759 (80.9) | 64,185 (86.3) | 1,103 (79.3) |
| Yes                                                | 9,387 (13.4)  | 1,122 (19.1) | 10,221 (13.7) | 288 (20.7)   |

**Supplementary Table S3.** Examining the direct association between assisted reproductive technologies and childhood asthma at 7 years not mediated by adverse pregnancy outcomes (low birth weight, preterm birth, pre-eclampsia and delivery by caesarean section)

| Study population      | Conceived by assisted reproductive technologies | Total association OR (95% CI) <sup>a</sup> | Direct association OR (95% CI) <sup>a</sup> | Indirect association OR (95% CI) <sup>a</sup> |
|-----------------------|-------------------------------------------------|--------------------------------------------|---------------------------------------------|-----------------------------------------------|
| Register-based cohort | No                                              | 1                                          | 1                                           | 1                                             |
|                       | Yes (total)                                     | 1.24 (1.12, 1.36)                          | 1.19 (1.08, 1.31)                           | 1.040 (1.034, 1.045)                          |
|                       | Yes (IVF)                                       | 1.24 (1.11, 1.38)                          | 1.19 (1.06, 1.33)                           | 1.039 (1.033, 1.045)                          |
|                       | Yes (ICSI)                                      | 1.27 (0.80, 2.02)                          | 1.20 (0.75, 1.92)                           | 1.052 (1.029, 1.076)                          |
|                       | Yes (Other/unspecified)                         | 1.20 (0.81, 1.78)                          | 1.15 (0.77, 1.72)                           | 1.037 (1.019, 1.057)                          |
| MoBa                  | No                                              | 1                                          | 1                                           | 1                                             |
|                       | Yes                                             | 1.49 (1.19, 1.87)                          | 1.43 (1.14, 1.80)                           | 1.04 (1.02, 1.05)                             |

<sup>a</sup>The analysis of the register-based cohort was adjusted for maternal age, parity, maternal current asthma and child sex. The analysis of MoBa was adjusted for maternal age, parity, education, smoking during pregnancy, pre-pregnancy BMI, maternal current asthma and child sex.

**Supplementary Table S4.** Examining the direct associations of parental history of treatment for childlessness and time to conception with childhood asthma at 7 years not mediated by adverse pregnancy outcomes (low birth weight, preterm birth, pre-eclampsia and delivery by caesarean section)

| Exposure                                         | Exposure group      | Total association<br>OR (95% CI) <sup>a</sup> | Direct association<br>OR (95% CI) <sup>a</sup> | Indirect association<br>OR (95% CI) <sup>a</sup> |
|--------------------------------------------------|---------------------|-----------------------------------------------|------------------------------------------------|--------------------------------------------------|
| Previously treated for<br>unwanted childlessness | No                  | 1                                             | 1                                              | 1                                                |
|                                                  | Yes                 | 1.31 (1.14, 1.51)                             | 1.28 (1.11, 1.48)                              | 1.03 (1.02, 1.03)                                |
| Time to conception                               | <6 months           | 1                                             | 1                                              | 1                                                |
|                                                  | 6-12 months         | 0.97 (0.88, 1.08)                             | 0.97 (0.87, 1.08)                              | 1.00 (0.99, 1.01)                                |
|                                                  | More than 12 months | 1.23 (1.08, 1.39)                             | 1.19 (1.05, 1.35)                              | 1.03 (1.02, 1.04)                                |

<sup>a</sup> Adjusted for maternal age, parity, education, smoking during pregnancy, pre-pregnancy BMI, maternal current asthma and child sex.

**Supplementary Table S5.** Examining the direct association between maternal history of miscarriages and childhood asthma at 7 years not mediated by adverse pregnancy outcomes (low birth weight, preterm birth, pre-eclampsia and delivery by caesarean section)

| Study population      | Exposure                                                     | Exposure group | Total association<br>OR (95% CI) <sup>a</sup> | Direct association<br>OR (95% CI) <sup>a</sup> | Indirect association<br>OR (95% CI) <sup>a</sup> |
|-----------------------|--------------------------------------------------------------|----------------|-----------------------------------------------|------------------------------------------------|--------------------------------------------------|
| Register-based cohort | Number of miscarriages within the first 12 gestational weeks | None           | 1                                             | 1                                              | 1                                                |
|                       |                                                              | 1              | 1.07 (1.03, 1.11)                             | 1.06 (1.02, 1.11)                              | 1.004 (1.003, 1.006)                             |
|                       |                                                              | 2              | 1.20 (1.11, 1.28)                             | 1.18 (1.10, 1.27)                              | 1.012 (1.009, 1.016)                             |
|                       |                                                              | 3 or more      | 1.26 (1.14, 1.39)                             | 1.21 (1.10, 1.34)                              | 1.037 (1.032, 1.043)                             |
|                       | Number of miscarriages between 12 and 23 gestational weeks   | None           | 1                                             | 1                                              | 1                                                |
|                       |                                                              | 1              | 1.21 (1.11, 1.31)                             | 1.18 (1.09, 1.28)                              | 1.022 (1.016, 1.027)                             |
|                       |                                                              | 2              | 1.03 (0.79, 1.33)                             | 0.99 (0.76, 1.28)                              | 1.042 (1.025, 1.058)                             |
|                       |                                                              | 3 or more      | 1.08 (0.60, 1.94)                             | 1.00 (0.55, 1.80)                              | 1.077 (1.051, 1.104)                             |
| MoBa                  | Number of miscarriages within the first 22 gestational weeks | None           | 1                                             | 1                                              | 1                                                |
|                       |                                                              | 1              | 1.06 (0.97, 1.16)                             | 1.06 (0.97, 1.16)                              | 1.00 (0.99, 1.01)                                |
|                       |                                                              | 2              | 1.18 (0.98, 1.42)                             | 1.17 (0.98, 1.41)                              | 1.01 (0.99, 1.01)                                |
|                       |                                                              | 3 or more      | 1.12 (0.75, 1.68)                             | 1.10 (0.73, 1.65)                              | 1.02 (1.01, 1.03)                                |

<sup>a</sup>The analysis of the register-based cohort was adjusted for maternal age, parity, maternal current asthma and child sex. The analysis of MoBa was adjusted for maternal age, parity, education, smoking during pregnancy, pre-pregnancy BMI, maternal current asthma and child sex.

**Supplementary Table S6.** Association between different measures of maternal fertility and childhood asthma at 7 years defined based on maternal report in the Norwegian Mother and Child Cohort Study

| Exposure                                                     | Exposure group      | N      | N cases (%) | Unadjusted<br>RR 95% CI | Adjusted <sup>a</sup><br>RR 95% CI | Adjusted <sup>b</sup><br>RR 95% CI |
|--------------------------------------------------------------|---------------------|--------|-------------|-------------------------|------------------------------------|------------------------------------|
| Number of miscarriages within 22 completed gestational weeks | None                | 31,550 | 1,744 (5.5) | 1                       | 1                                  | 1                                  |
|                                                              | 1                   | 6,015  | 339 (5.6)   | 1.02 (0.91, 1.14)       | 1.04 (0.92, 1.17)                  | 1.04 (0.93, 1.17)                  |
|                                                              | 2                   | 1,345  | 79 (5.9)    | 1.06 (0.85, 1.33)       | 1.08 (0.86, 1.35)                  | 1.07 (0.85, 1.34)                  |
|                                                              | 3 or more           | 463    | 28 (6.1)    | 1.09 (0.76, 1.57)       | 1.07 (0.75, 1.55)                  | 1.04 (0.73, 1.49)                  |
| Previously treated for unwanted childlessness                | No                  | 35,224 | 1,931 (5.5) | 1                       | 1                                  | 1                                  |
|                                                              | Yes                 | 3,293  | 214 (6.5)   | 1.19 (1.03, 1.36)       | 1.22 (1.06, 1.41)                  | 1.22 (1.06, 1.41)                  |
| Time to conception                                           | <6 months           | 31,112 | 1,679 (5.4) | 1                       | 1                                  | 1                                  |
|                                                              | 6-12 months         | 5,046  | 303 (6.0)   | 1.11 (0.99, 1.25)       | 1.11 (0.99, 1.25)                  | 1.11 (0.98, 1.25)                  |
|                                                              | More than 12 months | 3,215  | 208 (6.5)   | 1.20 (1.04, 1.38)       | 1.20 (1.03, 1.38)                  | 1.17 (1.01, 1.35)                  |
| Conceived by assisted reproductive technologies              | No                  | 38,590 | 2,141 (5.6) | 1                       | 1                                  | 1                                  |
|                                                              | Yes                 | 783    | 49 (6.3)    | 1.13 (0.86, 1.48)       | 1.23 (0.93, 1.62)                  | 1.20 (0.91, 1.59)                  |

<sup>a</sup> Adjusted for maternal age, parity, education, smoking during pregnancy, pre-pregnancy BMI and maternal current asthma.

<sup>b</sup> Adjusted for maternal age, parity, education, smoking during pregnancy, pre-pregnancy BMI, maternal current asthma, in addition to child sex, low birthweight, preterm birth, pre-eclampsia and delivery by caesarean sections.



**Supplementary Table S7.** Association between conception by assisted reproductive technologies and childhood asthma at 7 years stratified by maternal current asthma

| Study population      | Conceived by assisted reproductive technologies | No maternal current asthma |              |                      |                                 | Maternal current asthma |              |                      |                                 | p-value from test for interaction |
|-----------------------|-------------------------------------------------|----------------------------|--------------|----------------------|---------------------------------|-------------------------|--------------|----------------------|---------------------------------|-----------------------------------|
|                       |                                                 | N                          | N cases (%)  | Unadjusted RR 95% CI | Adjusted <sup>a</sup> RR 95% CI | N                       | N cases (%)  | Unadjusted RR 95% CI | Adjusted <sup>a</sup> RR 95% CI |                                   |
| Register-based cohort | No                                              | 446,064                    | 17,616 (4.0) | 1                    | 1                               | 19,970                  | 2,144 (10.7) | 1                    | 1                               | 0.11                              |
|                       | Yes (total)                                     | 8,050                      | 397 (4.9)    | 1.25 (1.13, 1.38)    | 1.23 (1.12, 1.36)               | 318                     | 32 (10.1)    | 0.94 (0.67, 1.30)    | 0.90 (0.65, 1.26)               |                                   |
|                       | Yes (IVF)                                       | 7,066                      | 353 (5.0)    | 1.27 (1.14, 1.40)    | 1.25 (1.12, 1.39)               | 273                     | 24 (8.8)     | 0.82 (0.56, 1.20)    | 0.78 (0.54, 1.16)               | 0.07                              |
|                       | Yes (ICSI)                                      | 462                        | 20 (4.3)     | 1.10 (0.71, 1.68)    | 1.08 (0.70, 1.66)               | 21                      | 5 (23.8)     | 2.22 (1.06, 4.65)    | 2.10 (0.99, 4.45)               |                                   |
|                       | Yes (Other/unspecified)                         | 522                        | 24 (4.6)     | 1.16 (0.79, 1.72)    | 1.15 (0.78, 1.70)               | 24                      | 3 (12.5)     | 1.16 (0.40, 3.38)    | 1.12 (0.38, 3.27)               |                                   |
| MoBa                  | No                                              | 71,859                     | 2,831 (3.9)  | 1                    | 1                               | 2,547                   | 313 (12.3)   | 1                    | 1                               | 0.52                              |
|                       | Yes                                             | 1,361                      | 80 (5.9)     | 1.49 (1.20, 1.85)    | 1.45 (1.16, 1.81)               | 30                      | 5 (16.7)     | 1.36 (0.61, 3.04)    | 1.00 (0.39, 2.54)               |                                   |

<sup>a</sup> The analysis of the register-based cohort was adjusted for maternal age, parity, and maternal current asthma. The analysis of MoBa was adjusted for maternal age, parity, education, smoking during pregnancy, pre-pregnancy BMI and maternal current asthma.

**Supplementary Table S8.** Association between measures of parental fertility and childhood asthma at 7 years in the Norwegian Mother and Child Cohort Study stratified by maternal current asthma

| Exposure                                      | Exposure group      | No maternal current asthma |             |                      |                                 | Maternal current asthma |             |                      |                                 | p-value from test for interaction |
|-----------------------------------------------|---------------------|----------------------------|-------------|----------------------|---------------------------------|-------------------------|-------------|----------------------|---------------------------------|-----------------------------------|
|                                               |                     | N                          | N cases (%) | Unadjusted RR 95% CI | Adjusted <sup>a</sup> RR 95% CI | N                       | N cases (%) | Unadjusted RR 95% CI | Adjusted <sup>a</sup> RR 95% CI |                                   |
| Previously treated for unwanted childlessness | No                  | 65,683                     | 2,545 (3.9) | 1                    | 1                               | 2,328                   | 282 (12.1)  | 1                    | 1                               | 0.46                              |
|                                               | Yes                 | 5,825                      | 299 (5.1)   | 1.32 (1.18, 1.49)    | 1.29 (1.14, 1.46)               | 193                     | 26 (13.5)   | 1.11 (0.76, 1.63)    | 1.04 (0.71, 1.53)               |                                   |
| Time to conception                            | <6 months           | 58,409                     | 2,272 (3.9) | 1                    | 1                               | 2,076                   | 253 (12.2)  | 1                    | 1                               | 0.28                              |
|                                               | 6-12 months         | 9,136                      | 346 (3.8)   | 0.97 (0.87, 1.09)    | 0.97 (0.86, 1.08)               | 295                     | 40 (13.6)   | 1.11 (0.81, 1.52)    | 1.06 (0.78, 1.46)               |                                   |
|                                               | More than 12 months | 5,675                      | 293 (5.2)   | 1.33 (1.18, 1.49)    | 1.23 (1.09, 1.39)               | 206                     | 25 (12.1)   | 1.00 (0.68, 1.46)    | 0.86 (0.57, 1.30)               |                                   |

<sup>a</sup> Adjusted for maternal age, parity, education, smoking during pregnancy, pre-pregnancy BMI and maternal current asthma.

**Supplementary Table S9.** Association between maternal history of miscarriages and childhood asthma at 7 years stratified by maternal current asthma

| Study population      | Exposure                                                     | Exposure group | No maternal current asthma |              |                      |                                 | Maternal current asthma |              |                      |                                 | p-value from test for interaction |
|-----------------------|--------------------------------------------------------------|----------------|----------------------------|--------------|----------------------|---------------------------------|-------------------------|--------------|----------------------|---------------------------------|-----------------------------------|
|                       |                                                              |                | N                          | N cases (%)  | Unadjusted RR 95% CI | Adjusted <sup>a</sup> RR 95% CI | N                       | N cases (%)  | Unadjusted RR 95% CI | Adjusted <sup>a</sup> RR 95% CI |                                   |
| Register-based cohort | Number of miscarriages within the first 12 gestational weeks | None           | 359,367                    | 13,971 (3.9) | 1                    | 1                               | 15,499                  | 1,657 (10.7) | 1                    | 1                               | 0.48                              |
|                       |                                                              | 1              | 69,864                     | 2,895 (4.1)  | 1.07 (1.02, 1.11)    | 1.08 (1.04, 1.12)               | 3,459                   | 361 (10.4)   | 0.98 (0.87, 1.09)    | 0.96 (0.86, 1.08)               |                                   |
|                       |                                                              | 2              | 17,506                     | 798 (4.6)    | 1.17 (1.09, 1.26)    | 1.20 (1.12, 1.29)               | 909                     | 104 (11.4)   | 1.07 (0.89, 1.29)    | 1.04 (0.86, 1.26)               |                                   |
|                       |                                                              | 3 or more      | 7,377                      | 349 (4.7)    | 1.22 (1.10, 1.35)    | 1.25 (1.12, 1.39)               | 421                     | 54 (12.8)    | 1.20 (0.93 (1.55)    | 1.16 (0.89, 1.50)               |                                   |
|                       | Number of miscarriages between 12 and 23 gestational weeks   | None           | 429,158                    | 16,941 (4.0) | 1                    | 1                               | 19,040                  | 2,038 (10.7) | 1                    | 1                               | 0.66                              |
|                       |                                                              | 1              | 10,595                     | 484 (4.6)    | 1.16 (1.06, 1.27)    | 1.22 (1.11, 1.33)               | 491                     | 62 (12.6)    | 1.18 (0.92, 1.51)    | 1.15 (0.90, 1.48)               |                                   |
|                       |                                                              | 2              | 1,224                      | 50 (4.1)     | 1.03 (0.78, 1.36)    | 1.10 (0.83, 1.46)               | 49                      | 3 (6.1)      | 0.57 (0.19, 1.72)    | 0.54 (0.18, 1.65)               |                                   |
|                       |                                                              | 3 or more      | 396                        | 15 (3.8)     | 0.96 (0.58, 1.58)    | 1.01 (0.61, 1.67)               | 22                      | 3 (13.6)     | 1.27 (0.44, 3.68)    | 1.19 (0.41, 3.47)               |                                   |
| MoBa                  | Number of miscarriages within the first 22 gestational weeks | None           | 58,901                     | 2,314 (3.9)  | 1                    | 1                               | 2,081                   | 250 (12.0)   | 1                    | 1                               | 0.50                              |
|                       |                                                              | 1              | 11,008                     | 456 (4.1)    | 1.05 (0.96, 1.16)    | 1.06 (0.96, 1.18)               | 356                     | 43 (12.1)    | 1.01 (0.74, 1.36)    | 1.01 (0.74, 1.37)               |                                   |
|                       |                                                              | 2              | 2,454                      | 105 (4.3)    | 1.09 (0.90, 1.32)    | 1.14 (0.94, 1.38)               | 101                     | 18 (17.8)    | 1.48 (0.94, 2.34)    | 1.45 (0.92, 2.30)               |                                   |
|                       |                                                              | 3 or more      | 857                        | 36 (4.2)     | 1.07 (0.77, 1.48)    | 1.09 (0.79, 1.51)               | 39                      | 7 (18.0)     | 1.49 (0.77, 2.90)    | 1.42 (0.69, 2.92)               |                                   |

<sup>a</sup>The analysis of the register-based cohort was adjusted for maternal age, parity, and maternal current asthma. The analysis of MoBa was adjusted for maternal age, parity, education, smoking during pregnancy, pre-pregnancy BMI and maternal current asthma.

<sup>b</sup> Additional adjustment child sex, low birthweight, preterm birth, pre-eclampsia and delivery by caesarean section.

**Supplementary Table S10.** Association between conception by assisted reproductive technologies and childhood asthma at 7 years stratified by preterm birth

| Study population      | Conceived by assisted reproductive technologies | Term    |              |                      |                                 | Preterm |             |                      |                                 | p-value from test for interaction |
|-----------------------|-------------------------------------------------|---------|--------------|----------------------|---------------------------------|---------|-------------|----------------------|---------------------------------|-----------------------------------|
|                       |                                                 | N       | N cases (%)  | Unadjusted RR 95% CI | Adjusted <sup>a</sup> RR 95% CI | N       | N cases (%) | Unadjusted RR 95% CI | Adjusted <sup>a</sup> RR 95% CI |                                   |
| Register-based cohort | No                                              | 441,516 | 18,041 (4.1) | 1                    | 1                               | 24,518  | 1,719 (7.0) | 1                    | 1                               | 0.68                              |
|                       | Yes (total)                                     | 7,702   | 372 (4.8)    | 1.18 (1.07, 1.31)    | 1.17 (1.06, 1.30)               | 666     | 57 (8.6)    | 1.22 (0.95, 1.57)    | 1.22 (0.94, 1.58)               |                                   |
|                       | Yes (IVF)                                       | 6,753   | 325 (4.8)    | 1.18 (1.06, 1.31)    | 1.17 (1.05, 1.30)               | 586     | 52 (8.9)    | 1.27 (0.97, 1.65)    | 1.27 (0.97, 1.66)               | 0.39                              |
|                       | Yes (ICSI)                                      | 445     | 24 (5.4)     | 1.32 (0.89, 1.95)    | 1.31 (0.89, 1.92)               | 38      | 1 (2.6)     | 0.37 (0.05, 2.60)    | 0.39 (0.06, 2.49)               |                                   |
|                       | Yes (Other/unspecified)                         | 504     | 23 (4.6)     | 1.12 (0.75, 1.67)    | 1.11 (0.74, 1.65)               | 42      | 4 (9.5)     | 1.36 (0.53, 3.45)    | 1.27 (0.49, 3.30)               |                                   |
| MoBa                  | No                                              | 70,606  | 2,904 (4.1)  | 1                    | 1                               | 3,528   | 233 (6.6)   | 1                    | 1                               | 0.34                              |
|                       | Yes                                             | 1,243   | 71 (5.7)     | 1.39 (1.11, 1.74)    | 1.35 (1.07, 1.70)               | 118     | 13 (11.0)   | 1.67 (0.98, 2.83)    | 1.77 (1.03, 3.06)               |                                   |

<sup>a</sup>The analysis of the register-based cohort was adjusted for maternal age, parity, and maternal current asthma. The analysis of MoBa was adjusted for maternal age, parity, education, smoking during pregnancy, pre-pregnancy BMI and maternal current asthma.

**Supplementary Table S11.** Association between measures of parental fertility and childhood asthma at 7 years in the Norwegian Mother and Child Cohort Study stratified by preterm birth

| Exposure                                      | Exposure group      | Term   |             |                      |                                 | Preterm |             |                      |                                 | p-value from test for interaction |
|-----------------------------------------------|---------------------|--------|-------------|----------------------|---------------------------------|---------|-------------|----------------------|---------------------------------|-----------------------------------|
|                                               |                     | N      | N cases (%) | Unadjusted RR 95% CI | Adjusted <sup>a</sup> RR 95% CI | N       | N cases (%) | Unadjusted RR 95% CI | Adjusted <sup>a</sup> RR 95% CI |                                   |
| Previously treated for unwanted childlessness | No                  | 64,598 | 2,614 (4.1) | 1                    | 1                               | 3,173   | 206 (6.5)   | 1                    | 1                               | 0.88                              |
|                                               | Yes                 | 5,575  | 290 (5.2)   | 1.29 (1.14, 1.45)    | 1.26 (1.11, 1.42)               | 390     | 34 (8.7)    | 1.34 (0.94, 1.91)    | 1.28 (0.87, 1.86)               |                                   |
| Time to conception                            | <6 months           | 57,466 | 2,339 (4.1) | 1                    | 1                               | 2,804   | 182 (6.5)   | 1                    | 1                               | 0.77                              |
|                                               | 6-12 months         | 8,947  | 355 (4.0)   | 0.97 (0.87, 1.09)    | 0.97 (0.87, 1.08)               | 450     | 29 (6.4)    | 0.99 (0.68, 1.45)    | 1.02 (0.70, 1.50)               |                                   |
|                                               | More than 12 months | 5,436  | 281 (5.2)   | 1.27 (1.13, 1.43)    | 1.16 (1.03, 1.32)               | 392     | 35 (8.9)    | 1.38 (0.98, 1.94)    | 1.31 (0.91, 1.90)               |                                   |

<sup>a</sup> Adjusted for maternal age, parity, education, smoking during pregnancy, pre-pregnancy BMI and maternal current asthma.

**Supplementary Table S12.** Association between maternal history of miscarriages and childhood asthma at 7 years stratified by preterm birth

| Study population      | Exposure                                                     | Exposure group | Term    |              |                      |                                 | Preterm |             |                      |                                 | p-value from test for interaction |
|-----------------------|--------------------------------------------------------------|----------------|---------|--------------|----------------------|---------------------------------|---------|-------------|----------------------|---------------------------------|-----------------------------------|
|                       |                                                              |                | N       | N cases (%)  | Unadjusted RR 95% CI | Adjusted <sup>a</sup> RR 95% CI | N       | N cases (%) | Unadjusted RR 95% CI | Adjusted <sup>a</sup> RR 95% CI |                                   |
| Register-based cohort | Number of miscarriages within the first 12 gestational weeks | None           | 355,532 | 14,328 (4.0) | 1                    | 1                               | 19,334  | 1,300 (6.7) | 1                    | 1                               | 0.27                              |
|                       |                                                              | 1              | 69,280  | 2,938 (4.2)  | 1.05 (1.01, 1.09)    | 1.05 (1.01, 1.10)               | 4,043   | 318 (7.9)   | 1.17 (1.04, 1.32)    | 1.15 (1.02, 1.29)               |                                   |
|                       |                                                              | 2              | 17,272  | 805 (4.7)    | 1.16 (1.08, 1.24)    | 1.16 (1.08, 1.25)               | 1,143   | 97 (8.5)    | 1.26 (1.04, 1.54)    | 1.24 (1.02, 1.51)               |                                   |
|                       |                                                              | 3 or more      | 7,134   | 342 (4.8)    | 1.19 (1.07, 1.32)    | 1.19 (1.07, 1.33)               | 664     | 61 (9.2)    | 1.37 (1.06, 1.75)    | 1.32 (1.02, 1.70)               |                                   |
|                       | Number of miscarriages between 12 and 23 gestational weeks   | None           | 424,857 | 17,352 (4.1) | 1                    | 1                               | 23,341  | 1,627 (7.0) | 1                    | 1                               | 0.44                              |
|                       |                                                              | 1              | 10,227  | 471 (4.6)    | 1.13 (1.03, 1.24)    | 1.18 (1.07, 1.29)               | 859     | 75 (8.7)    | 1.25 (1.00, 1.56)    | 1.21 (0.96, 1.52)               |                                   |
|                       |                                                              | 2              | 1,152   | 48 (4.2)     | 1.02 (0.77, 1.35)    | 1.09 (0.83, 1.45)               | 121     | 5 (4.1)     | 0.60 (0.25, 1.40)    | 0.55 (0.24, 1.30)               |                                   |
|                       |                                                              | 3 or more      | 364     | 15 (4.1)     | 1.01 (0.61, 1.66)    | 1.06 (0.64, 1.75)               | 54      | 3 (5.6)     | 0.80 (0.26, 2.40)    | 0.71 (0.25, 2.06)               |                                   |
| MoBa                  | Number of miscarriages within the first 22 gestational weeks | None           | 57,867  | 2,379 (4.1)  | 1                    | 1                               | 2,869   | 179 (6.2)   | 1                    | 1                               | 0.13                              |
|                       |                                                              | 1              | 10,748  | 449 (4.2)    | 1.02 (0.92, 1.12)    | 1.03 (0.93, 1.14)               | 575     | 49 (8.5)    | 1.37 (1.00, 1.86)    | 1.47 (1.06, 2.04)               |                                   |
|                       |                                                              | 2              | 2,401   | 111 (4.6)    | 1.12 (0.93, 1.36)    | 1.16 (0.96, 1.40)               | 143     | 11 (7.7)    | 1.23 (0.69, 2.21)    | 1.27 (0.69, 2.34)               |                                   |
|                       |                                                              | 3 or more      | 833     | 36 (4.3)     | 1.05 (0.76, 1.45)    | 1.06 (0.77, 1.47)               | 59      | 7 (11.9)    | 1.90 (0.95, 3.81)    | 1.90 (1.08, 3.36)               |                                   |

<sup>a</sup> The analysis of the register-based cohort was adjusted for maternal age, parity, and maternal current asthma. The analysis of MoBa was adjusted for maternal age, parity, education, smoking during pregnancy, pre-pregnancy BMI and maternal current asthma.

<sup>b</sup> Additional adjustment child sex, low birthweight, preterm birth, pre-eclampsia and delivery by caesarean section.

**Supplementary Table S13.** Exploring the additional adjustment for use of assisted reproductive technologies for the association between maternal history of miscarriages and childhood asthma at 7 years

| Study population      | Exposure                                                     | Exposure group | N       | N cases (%)  | Unadjusted RR 95% CI | Adjusted <sup>a</sup> RR 95% CI | Adjusted <sup>b</sup> RR 95% CI |
|-----------------------|--------------------------------------------------------------|----------------|---------|--------------|----------------------|---------------------------------|---------------------------------|
| Register-based cohort | Number of miscarriages within the first 12 gestational weeks | None           | 374,866 | 15,628 (4.2) | 1                    | 1                               | 1                               |
|                       |                                                              | 1              | 73,323  | 3,256 (4.4)  | 1.07 (1.03, 1.11)    | 1.07 (1.03, 1.11)               | 1.07 (1.03, 1.11)               |
|                       |                                                              | 2              | 18,415  | 902 (4.9)    | 1.17 (1.10, 1.26)    | 1.18 (1.10, 1.26)               | 1.18 (1.10, 1.26)               |
|                       |                                                              | 3 or more      | 7,798   | 403 (5.2)    | 1.24 (1.12, 1.37)    | 1.24 (1.12, 1.37)               | 1.24 (1.12, 1.36)               |
|                       | Number of miscarriages between 12 and 23 gestational weeks   | None           | 448,198 | 18,979 (4.2) | 1                    | 1                               | 1                               |
|                       |                                                              | 1              | 11,086  | 546 (4.9)    | 1.16 (1.07, 1.27)    | 1.21 (1.11, 1.32)               | 1.20 (1.10, 1.31)               |
|                       |                                                              | 2              | 1,273   | 53 (4.2)     | 0.98 (0.75, 1.29)    | 1.04 (0.79, 1.36)               | 1.03 (0.79, 1.35)               |
|                       |                                                              | 3 or more      | 418     | 18 (4.3)     | 1.02 (0.65, 1.60)    | 1.04 (0.66, 1.65)               | 1.04 (0.66, 1.64)               |
| MoBa                  | Number of miscarriages within the first 22 gestational weeks | None           | 60,982  | 2,564 (4.2)  | 1                    | 1                               | 1                               |
|                       |                                                              | 1              | 11,364  | 499 (4.4)    | 1.04 (0.95, 1.15)    | 1.06 (0.96, 1.16)               | 1.06 (0.96, 1.16)               |
|                       |                                                              | 2              | 2,555   | 123 (4.8)    | 1.14 (0.96, 1.37)    | 1.18 (0.98, 1.41)               | 1.18 (0.98, 1.41)               |
|                       |                                                              | 3 or more      | 896     | 43 (4.8)     | 1.14 (0.85, 1.53)    | 1.14 (0.85, 1.53)               | 1.13 (0.84, 1.51)               |

<sup>a</sup> The analysis of the register-based cohort was adjusted for maternal age, parity, and maternal current asthma. The analysis of MoBa was adjusted for maternal age, parity, education, smoking during pregnancy, pre-pregnancy BMI and maternal current asthma.

<sup>b</sup> Additional adjustment for use of assisted reproductive technologies.
